# Supplementary material for: Between Leaves and Branches: Floristic, Phylogenetic and Spatial Diversity of Plants Used by the Povo De Terreiro in Brazil
Source: Research Square preprint supplement (doi:10.21203/rs.3.rs-7762716/v1), 2025-10-07
Supplement: Supplementary file 1 [file 9503f8f5bccfc78e4964dec8.docx]

Electronic Supplementary Material 2

| Autor-Ano | Local | Título | Bioma |
| --- | --- | --- | --- |
| Albuquerque 2001 | Recife, PE | The use of medicinal plants by the cultural descendants of African People in Brazil | Mata Atlântica |
| Albuquerque e Chiappeta 1994 | Recife, PE | O uso de plantas e a concepção de doença e cura nos cultos afro-brasileiros | Mata Atlântica |
| Almeida et al. 2014 | São Francisco do Conde, BA | Species with medicinal and mystical-religious uses in São Francisco do Conde, Bahia, Brazil: a contribution to the selection of species for introduction into the local Unified Health System | Mata Atlântica |
| Alves et al. 2019 | Ituiutaba, MG | Ethnobotany of ritualistic plants in the religious practice of African matrix in the city of Ituiutaba, Minas Gerais, Brazil | Cerrado |
| Arruda et al. 2019 | Puxinanã, PA | Uso de plantas medicinais na Umbanda e Candomblé em associação cultural no município de Puxinanã, Paraíba | Caatinga |
| Baudauf et al. 2009 | Porto Alegre, RS | “Ferveu, queimou o ser da erva”: conhecimentos de especialistas locais sobre plantas medicinais na região Sul do Brasil | Pampa |
| Braga et al. 2017 | Fortaleza, CE | Perception of Candomble practitioners about herbal medicine and health promotion in Ceará, Brazil | Caatinga |
| Camargo 1990 | Jardim Tremembé, SP | As plantas condimentícias nas comidas rituais de cultos afro-brasileiros | Mata Atlântica |
| Camargo 1997 | São Paulo, SP | Contribuição ao estudo etnobotânico de plantas do gênero Erythrina usadas em rituais de religiões afro-brasileiras | Mata Atlântica |
| Camargo 2014 | Embu das Artes, SP | Contribuição ao estudo Etnofarmacobotânico da bebida ritual de religiões afro brasileiras denominada “vinho da Jurema” e seus aditivos psicoativos | Mata Atlântica |
| Carvalho et al. 2015 | Juiz de Fora, MG | Manutenção da tradição e do conhecimento sobre plantas medicinais em terreiros de Umbanda e Candomblé na Zona da Mata de Minas Gerais | Mata Atlântica |
| Elias e Zanete 2021 | Cocal do Sul, SC | Plantas medicinais utilizadas em rituais de Umbanda: estudo de caso no sul do Brasil | Mata Atlântica |
| Favaro 2015 | Dois Vizinhos, PR | Etnobotânica dos cultos afro-brasileiros na região sudoeste do paraná: a importância das plantas na construção da identidade cultural | Mata Atlântica |
| Fernandes 2017 | Ponta Porã, MS | O uso vegetal em cultos afrodescendentes: um estudo de caso na fronteira Brasil e Paraguai | Cerrado |
| Ferreira 2017 | Cocal do Sul, SC | Plantas medicinais utilizadas em rituais de religiões de matriz afro-brasileira: estudo de caso Umbanda | Mata Atlântica |
| Fonseca et al. 2018 | Abaetetuba, PA | Banho de Cheiro de São João em Abaetetuba, Pará | Amazônia |
| Garcia et al. 2016 | Diadema, SP | Defumadores com possível efeito ansiolítico utilizados no Centro de Umbanda Caboclo Ubirajara e Exu Ventania, Diadema, SP, Brasil: um estudo etnofarmacológico | Mata Atlântica |
| Gomes et al. 2008 | Campina Grande, PB | Plantas Medicinais: sua utilização nos Terreiros de Umbanda e Candomblé na Zona Leste da Cidade de Campina Grande-PB | Caatinga |
| Guedes et al. 1985 | Rio de Janeiro, RJ | Plantas utilizadas em rituais afro-brasileiros no Estado do Rio de Janeiro - Um ensaio etnobotânico | Mata Atlântica |
| Oliveira e Oliveira 2019 | Cachoeira, BA | Sociobiodiversidade, Cultura e Natureza no Terreiro Icimimó (Cachoeira / BA) | Mata Atlântica |
| Pagnocca et al. 2017 | Florianópolis, SC | “The plants have axé”: investigating the use of plants in Afro-Brazilian religions of Santa Catarina Island | Mata Atlântica |
| Paz et al. 2015 | Juazeiro do Norte, CE | Plantas medicinais no Candomblé como elemento de resistência cultural e cuidado à saúde | Caatinga |
| Perizzano e Baldoni 2022 | São Borja, RS | Potencial de uso medicinal e místico de plantas utilizadas em rituais de Umbanda | Pampa |
| Pinheiro et al. 2021 | ITUIUTABA, MG | As plantas nos rituais de Candomblé na saúde do corpo, da mente e do espírito: com destaque ao município de Ituiutaba, MG | Cerrado |
| Pires et al. 2019 | Itabuna, Bahia | Etnobotânica de terreiros de Candomblé nos municípios de Ilhéus e Itabuna, Bahia, Brasil | Mata Atlântica |
| Santos e Fortuna 2023 | Teixeira de Freitas, BA | A etnobotânica do terreiro Tenda de Umbanda Luz Divina de São Jorge, Teixeira de Freitas, Bahia, Brasil | Mata Atlântica |
| Santos e Santos 2021 | Petrolina, PE | Orixá, Natureza e Homem: um só ecossistema - usos de plantas nos Terreiros de Candomblé e Umbanda no Sertão do Brasil | Caatinga |
| Satiro 2020 | Taquarana, AL | Uso místico, mágico e medicinal de plantas nos rituais religiosos de Candomblé no Agreste Alagoano | Caatinga |
| Sousa 2010 | São Félix, BA | Estudos antropológicos e etnobotânicos das plantas utilizadas de forma medicinal e mágico-religiosa na comunidade de quilombo de São Félix - BA | Mata Atlântica |
| Torres 2018 | Porto Alegre, RS | Relação de espécies botânicas empregadas nos templos de Umbanda Nagô | Pampa |
| Voeks 2012 | Itabuna, BA | Spiritual Flora of Brazil's African Diaspora: Ethnobotanical Conversations in the Black Atlantic | Mata Atlântica |
