# Supplementary material for: Between Leaves and Branches: Floristic, Phylogenetic and Spatial Diversity of Plants Used by the Povo De Terreiro in Brazil
Source: Research Square preprint supplement (doi:10.21203/rs.3.rs-7762716/v1), 2025-10-07
Supplement: Supplementary file 2 [file a458f12555450ef0fcdaf971.docx]

Electronic Supplementary Material 1

| Acanthaceae | |
| --- | --- |
| *Brillantaisia owariensis* P.Beauv. | Exotic |
| *Elytraria acaulis* (L.f.) Lindau | Exotic |
| *Hemigraphis alternata* (Burm. f.) T Anderson | Exotic |
| *Justicia gendarussa* Burm.f. | Exotic |
| *Justicia pectoralis* Jacq. | Native |
| Adoxaceae | |
| *Sambucus australis* Cham. & Schltdl. | Native |
| *Sambucus nigra* L. | Exotic |
| Aizoaceae | |
| *Trianthema portulacastrum* L. | Exotic |
| Alismataceae | |
| *Echinodorus grandiflorus* (Cham. & Schltr.) Micheli | Native |
| Amaranthaceae | |
| *Alternanthera brasiliana* (L.) Kuntze | Native |
| *Alternanthera philoxeroides* (Mart.) Griseb. | Native |
| *Alternanthera pungens* Kunth | Native |
| *Alternanthera sessilis* (L.) R.Br. | Native |
| *Alternanthera tenella* Colla | Native |
| *Amaranthus caudatus* L. | Native |
| *Amaranthus spinosus* L. | Exotic |
| *Amaranthus viridis* L. | Exotic |
| *Beta vulgaris* L. | Exotic |
| *Celosia trigyna* L. | Exotic |
| *Dysphania ambrosioides* (L.) Mosyakin & Clemants | Native |
| *Pfaffia glomerata* (Spreng.) Pedersen | Native |
| *Pupalia lappacea* (L.) Juss. | Exotic |
| *Spinacia oleracea* L. | Exotic |
| Amaryllidaceae | |
| *Allium cepa* L. | Exotic |
| *Allium fistulosum* L. | Exotic |
| *Allium sativum* L. | Exotic |
| *Allium schoenoprasum* L. | Exotic |
| *Hippeastrum puniceum* (Lam.) Kuntze | Native |
| *Narcissus poeticus* L. | Exotic |
| Anacardiaceae | |
| *Anacardium humile* A.St.-Hil. | Native |
| *Anacardium occidentale* L. | Native |
| *Astronium concinnum* Schott | Native |
| *Astronium urundeuva* (M.Allemão) Engl. | Native |
| *Lithraea molleoides* (Vell.) Engl. | Native |
| *Mangifera indica* L. | Exotic |
| *Schinopsis brasiliensis* Engl. | Native |
| *Schinus terebinthifolia* Raddi | Native |
| *Spondias dulcis* Parkinson | Exotic |
| *Spondias macrocarpa* Engl. | Native |
| *Spondias mombin* L. | Native |
| *Spondias purpurea* L. | Exotic |
| *Spondias tuberosa* Arruda | Native |
| *Tapirira guianensis* Aubl. | Native |
| Annonaceae | |
| *Annona acutiflora* Mart. | Native |
| *Annona muricata* L. | Exotic |
| *Annona salzmannii* A.DC. | Native |
| *Annona senegalensis* Pers. | Exotic |
| *Annona squamosa* L. | Exotic |
| *Guatteria scandens* Diels | Native |
| *Xylopia aethiopica* (Dunal) A.Rich. | Exotic |
| *Xylopia aromatica* (Lam.) Mart. | Native |
| *Xylopia frutescens* Aubl. | Native |
| *Xylopia sericea* A.St.-Hil. | Native |
| Apiaceae | |
| *Anethum graveolens* L. | Exotic |
| *Arracacia xanthorrhiza* Bancr. | Exotic |
| *Centella asiatica* (L.) Urb. | Native |
| *Coriandrum sativum* L. | Exotic |
| *Daucus carota* L. | Exotic |
| *Eryngium foetidum* L. | Native |
| *Foeniculum vulgare* Mill. | Exotic |
| *Petroselinum crispum* (Mill.) Fuss | Exotic |
| *Pimpinella anisum* L. | Exotic |
| Apocynaceae | |
| *Aspidosperma cuspa* (Kunth) S.F.Blake | Native |
| *Callichilia barteri* (Hook.f.) Stapf | Exotic |
| *Catharanthus roseus* (L.) Don | Exotic |
| *Cryptolepis calophylla* (Baill.) L.Joubert & Bruyns | Exotic |
| *Himatanthus bracteatus* (A. DC.) Woodson | Native |
| *Himatanthus drasticus* (Mart.) Plumel | Native |
| *Nerium oleander* L. | Exotic |
| *Pergularia daemia* subsp. daemia | Exotic |
| *Plumeria rubra* L. | Exotic |
| *Secamone afzelii* (Roem. & Schult.) K.Schum. | Exotic |
| *Thevetia peruviana* (Pers.) K.Schum. | Native |
| *Vinca minor* L. | Exotic |
| Aquifoliaceae | |
| *Ilex paraguariensis* A.St.-Hil. | Native |
| Araceae | |
| *Colocasia esculenta* (L.) Schott | Exotic |
| *Dieffenbachia seguine* (Jacq.) Schott | Native |
| *Epipremnum pinnatum* (L.) Engl. | Exotic |
| *Monstera adansonii* Schott | Native |
| *Philodendron pedatum* (Hook.) Kunth | Native |
| *Pistia stratiotes* L. | Native |
| *Spathiphyllum wallisii* Regel | Exotic |
| Araliaceae | |
| *Dendropanax cuneatus* (DC.) Decne. & Planch. | Native |
| *Polyscias guilfoylei* (W.Bull) L.H.Bailey | Exotic |
| *Polyscias scutellaria* (Burm.f.) Fosberg | Exotic |
| Araucariaceae | |
| *Araucaria angustifolia* (Bertol.) Kuntze | Native |
| Arecaceae | |
| *Attalea oleifera* Barb.Rodr. | Native |
| *Attalea speciosa* Mart. ex Spreng. | Native |
| *Cocos nucifera* L. | Exotic |
| *Elaeis guineensis* Jacq. | Exotic |
| *Elaeis oleifera* (Kunth) Cortés | Native |
| *Euterpe edulis* Mart. | Native |
| *Raphia vinifera* P.Beauv. | Exotic |
| *Syagrus coronata* (Mart.) Becc. | Native |
| *Syagrus romanzoffiana* (Cham.) Glassman | Native |
| Aristolochiaceae | |
| *Arisarum vulgare* O.Targ.Tozz. | Exotic |
| *Aristolochia cymbifera* Mart. & Zucc. | Native |
| *Aristolochia elegans* Mast. | Native |
| *Aristolochia eriantha* Mart. & Zucc. | Native |
| *Aristolochia esperanzae* Kuntze | Native |
| *Aristolochia labiata* Willd. | Native |
| *Aristolochia triangularis* Cham. & Schltdl. | Native |
| Asparagaceae | |
| *Agave americana* L. | Exotic |
| *Aloe vera* (L.) Burm.f. | Exotic |
| *Cordyline fruticosa* (L.) A.Chev. | Exotic |
| *Dracaena angolensis* (Welw. ex Carrière) Byng & Christenh. | Exotic |
| *Dracaena fragrans* (L.) Ker Gawl. | Exotic |
| *Dracaena trifasciata* (Prain) Mabb. | Exotic |
| *Dracaena trifasciata* subsp. trifasciata | Exotic |
| *Dracaena zeylanica* (L.) Mabb. | Exotic |
| *Polianthes tuberosa* L. | Exotic |
| Asteraceae | |
| *Acanthospermum australe* (Loefl.) Kuntze | Native |
| *Acanthospermum hispidum* DC. | Native |
| *Achyrocline satureioides* (Lam.) DC. | Native |
| *Acmella oleracea* (L.) R.K.Jansen | Native |
| *Acmella uliginosa* (Sw.) Cass. | Native |
| *Ageratum conyzoides* L. | Native |
| *Argyranthemum frutescens* (L.) Sch.Bip. | Exotic |
| *Aristolochia cauliflora* Ule | Native |
| *Arnica montana* L. | Exotic |
| *Artemisia absinthium* L. | Exotic |
| *Artemisia vulgaris* L. | Exotic |
| *Ayapana triplinervis* (M.Vahl) R.M.King & H.Rob. | Native |
| *Baccharis articulata* (Lam.) Pers. | Native |
| *Baccharis crispa* Spreng. | Native |
| *Baccharis dracunculifolia* DC. | Native |
| *Bauhinia variegata* L. | Exotic |
| *Bidens pilosa* L. | Native |
| *Blainvillea acmella* (L.) Philipson | Native |
| *Calea pinnatifida* (R.Br.) Less. | Native |
| *Calendula officinalis* L. | Exotic |
| *Centaurea benedicta* (L). L. | Exotic |
| *Centratherum punctatum* Cass. | Native |
| *Chrysanthellum americanum* (L.) Vatke | Exotic |
| *Cirsium vulgare* (Savi) Ten. | Exotic |
| *Coreopsis grandiflora* *Hogg ex* Sweet | Exotic |
| *Eclipta prostrata* (L.) L. | Native |
| *Elephantopus mollis* Kunth | Native |
| *Emilia abyssinica* (Sch.Bip. ex A.Rich.) C.Jeffrey | Exotic |
| *Erechtites valerianifolius* (Link ex Spreng.) DC. | Native |
| *Eremanthus capitatus* (Spreng.) MacLeish | Native |
| *Galinsoga parviflora* Cav. | Exotic |
| *Gymnanthemum amygdalinum* (Delile) Sch.Bip. ex Walp. | Exotic |
| *Helianthus annuus* L. | Exotic |
| *Lactuca sativa* L. | Exotic |
| *Launaea taraxacifolia* (Willd.) *Amin ex* C.Jeffrey | Exotic |
| *Matricaria chamomilla* L. | Exotic |
| *Matricaria recutita* L. | Exotic |
| *Mikania glomerata* Spreng. | Native |
| *Mikania laevigata* Sch.Bip. ex Baker | Native |
| *Pectis brevipedunculata* (Gardner) Sch.Bip. | Native |
| *Pluchea sagittalis* (Lam.) Cabrera | Native |
| *Solidago chilensis* Meyen | Native |
| *Sonchus oleraceus* L. | Exotic |
| *Sphagneticola trilobata* (L.) Pruski | Native |
| *Tanacetum vulgare* L. | Exotic |
| *Verbesina macrophylla* (Cass.) S.F.Blake | Native |
| *Vernonanthura brasiliana* (L.) H.Rob. | Native |
| *Vernonanthura polyanthes* (Sprengel) Vega & Dematteis | Native |
| *Vernonia colorata* (Willd.) Drake | Exotic |
| Balsaminaceae | |
| *Impatiens walleriana* Hook.f. | Exotic |
| Begoniaceae | |
| *Begonia saxifraga* A.DC. | Native |
| *Begonia semperflorens* Link & Otto | Native |
| Bignoniaceae | |
| *Bignonia nocturna* (Barb.Rodr.) L.G.Lohmann | Native |
| *Crescentia cujete* L. | Exotic |
| *Fridericia chica* (Bonpl.) L.G.Lohmann | Native |
| *Handroanthus impetiginosus* (Mart. ex DC.) Mattos | Native |
| *Handroanthus umbellatus* (Sond.) Mattos | Native |
| *Kigelia africana* (Lam.) Benth. | Exotic |
| *Mansoa alliacea* (Lam.) A.H.Gentry | Native |
| *Newbouldia laevis* (P. Beauv.) Seem. ex Bureau | Exotic |
| *Pyrostegia venusta* (Ker Gawl.) Miers | Native |
| *Sparattosperma leucanthum* (Vell.) K.Schum. | Native |
| *Tabebuia aurea* (Silva Manso) Benth. & Hook.f. ex S.Moore | Native |
| Bixaceae | |
| *Bixa orellana* L. | Native |
| Boraginaceae | |
| *Symphytum officinale* L. | Exotic |
| Brassicaceae | |
| *Brassica juncea* (L.) Czern. | Exotic |
| *Brassica oleracea* L. | Exotic |
| *Brassica rapa* L. | Exotic |
| *Coronopus didymus* (L.) Sm. | Exotic |
| *Rorippa nasturtium-aquaticum* (L.) Hayek | Exotic |
| Bromeliaceae | |
| *Ananas bracteatus* (Lindl.) Schult. & Schult.f. | Native |
| *Ananas comosus* (L.) Merril | Native |
| *Bromelia antiacantha* Bertol. | Native |
| *Bromelia laciniosa* Mart. ex Schult. & Schult.f. | Native |
| *Tillandsia usneoides* (L.) L. | Native |
| Burseraceae | |
| *Commiphora myrrha* (T.Nees) Engl. | Exotic |
| *Protium catuaba* (Soares da Cunha) Daly & P.Fine | Native |
| *Protium heptaphyllum* (Aubl.) Marchand | Native |
| Cactaceae | |
| *Cereus jamacaru* DC. | Native |
| *Epiphyllum phyllanthus* (L.) Haw. | Native |
| *Pereskia aculeata* Mill. | Native |
| Campanulaceae | |
| *Hippobroma longiflora* (L.) G.Don | Native |
| Cannabaceae | |
| *Cannabis sativa* L. | Exotic |
| *Trema micranthum* (L.) Blume | Native |
| Cannaceae | |
| *Canna indica* L. | Native |
| Caricaceae | |
| *Carica papaya* L. | Exotic |
| Caryophyllaceae | |
| *Dianthus caryophyllus* L. | Exotic |
| Celastraceae | |
| *Maytenus ilicifolia* Mart. ex Reissek | Native |
| *Monteverdia ilicifolia* (Mart. ex Reissek) Biral | Native |
| *Monteverdia truncata* (Nees) Biral | Native |
| *Peritassa calypsoides* (Cambess.) A.C. Sm. | Native |
| Clusiaceae | |
| *Garcinia kola* Heckel | Exotic |
| Combretaceae | |
| *Terminalia catappa* L. | Exotic |
| *Terminalia glabrescens* Mart. | Native |
| Commelinaceae | |
| *Commelina benghalensis* L. | Exotic |
| *Commelina diffusa* Burm.f. | Exotic |
| *Commelina erecta* L. | Native |
| *Dichorisandra thyrsiflora* J.C.Mikan | Native |
| *Murdannia nudiflora* (L.) Brenan | Exotic |
| *Tradescantia spathacea* Sw. | Exotic |
| Convolvulaceae | |
| *Convolvulus betonicifolius* Mill. | Exotic |
| *Distimake dissectus* (Jacq.) A.R. Simões & Staples | Native |
| *Ipomoea alba* L. | Native |
| *Ipomoea aquatica* var. aquatica | Exotic |
| *Ipomoea bahiensis* Willd. ex Roem. & Schult. | Native |
| *Ipomoea batatas* (L.) Lam. | Exotic |
| *Ipomoea pes-caprae* (L.) R.Br. | Native |
| *Operculina macrocarpa* (L.) Urb. | Native |
| Cordiaceae | |
| *Cordia nodosa* Lam. | Native |
| *Cordia superba* Cham. | Native |
| *Varronia curassavica* Jacq. | Native |
| Costaceae | |
| *Costus spicatus* (Jacq.) Sw. | Native |
| Crassulaceae | |
| *Cotyledon orbiculata* L. | Exotic |
| *Kalanchoe crenata* (Andrews) Haw. | Exotic |
| *Kalanchoe laetivirens* Desc. | Exotic |
| *Kalanchoe pinnata* (Lam.) Pers. | Exotic |
| Cucurbitaceae | |
| *Bryonia dioica* Bojer | Exotic |
| *Cayaponia tayuya* (Vell.) Cogn. | Native |
| *Citrullus lanatus* (Thunb.) Matsum. & Nakai | Exotic |
| *Cucumis melo* L. | Exotic |
| *Cucumis sativus* L. | Exotic |
| *Cucurbita maxima* *Duchesne ex* Lam. | Exotic |
| *Cucurbita moschata* Duchesne | Exotic |
| *Cucurbita pepo* L. | Exotic |
| *Fevillea trilobata* L. | Native |
| *Lagenaria breviflora* (Benth.) Roberty | Exotic |
| *Lagenaria siceraria* (Molina) Standl. | Exotic |
| *Luffa cylindrica* (L.) M.Roem. | Exotic |
| *Luffa operculata* (L.) Cogn. | Native |
| *Momordica balsamina* L. | Exotic |
| *Momordica charantia* L. | Exotic |
| *Sicyos edulis* Jacq. | Exotic |
| Cupressaceae | |
| *Cupressus sempervirens* L. | Exotic |
| *Thuja occidentalis* L. | Exotic |
| Cyperaceae | |
| *Cyperus odoratus* L. | Native |
| *Cyperus rotundus* L. | Exotic |
| *Fuirena umbellata* Rottb. | Native |
| *Rhynchospora nervosa* (Vahl) Boeckeler | Native |
| *Rhynchospora setigera* (Kunth) Griseb. | Native |
| Dilleniaceae | |
| *Davilla rugosa* Poir. | Native |
| Dioscoreaceae | |
| *Dioscorea alata* L. | Exotic |
| *Dioscorea bulbifera* L. | Exotic |
| *Dioscorea cayennensis* Lam. | Exotic |
| *Dioscorea trifida* L.f. | Native |
| Equisetaceae | |
| *Equisetum giganteum* L. | Native |
| Euphorbiaceae | |
| *Acalypha poiretii* Spreng. | Native |
| *Alchornea cordifolia* (Schumach. & Thonn.) Müll.Arg. | Exotic |
| *Alchornea triplinervia* (Spreng.) Müll.Arg. | Native |
| *Cnidoscolus urens* (L.) Arthur | Native |
| *Croton antisyphiliticus* Mart. | Native |
| *Croton gratissimus* var. gratissimus | Exotic |
| *Croton grewioides* Baill. | Native |
| *Croton heliotropiifolius* Kunth | Native |
| *Croton pedicellatus* Kunth | Native |
| *Croton urucurana* Baill. | Native |
| *Euphorbia convolvuloides* Hochst. ex Benth. | Exotic |
| *Euphorbia hirta* L. | Native |
| *Euphorbia prostrata* Aiton | Native |
| *Euphorbia tirucalli* L. | Exotic |
| *Euphorbia tithymaloides* L. | Exotic |
| *Euphorbia trigona* Mill. | Exotic |
| *Jatropha curcas* L. | Exotic |
| *Jatropha gossypiifolia* L. | Native |
| *Manihot esculenta* Crantz | Native |
| *Microstachys corniculata* (Vahl) Griseb. | Native |
| *Ricinus communis* L. | Exotic |
| *Sagotia racemosa* Baill. | Native |
| *Sebastiania brasiliensis* Spreng. | Native |
| *Tragia volubilis* L. | Native |
| Fabaceae | |
| *Abrus precatorius* L. | Native |
| *Adenanthera pavonina* L. | Exotic |
| *Amburana cearensis* (Allemão) A.C.Sm. | Native |
| *Anadenanthera colubrina* (Vell.) Brenan | Native |
| *Arachis hypogaea* L. | Exotic |
| *Bacopa axillaris* (Benth.) Standl. | Exotic |
| *Bauhinia forficata* Link | Native |
| *Bauhinia monandra* Kurz | Exotic |
| *Caesalpinia pulcherrima* (L.) Sw. | Exotic |
| *Cajanus cajan* (L.) Huth | Exotic |
| *Canavalia ensiformis* (L.) DC. | Exotic |
| *Cassia fistula* L. | Exotic |
| *Cenostigma macrophyllum* Tul. | Native |
| *Cenostigma pyramidale* (Tul.) Gagnon & G.P.Lewis | Native |
| *Centrosema brasilianum* (L.) Benth. | Native |
| *Cicer arietinum* L. | Exotic |
| *Clitoria guianensis* (Aubl.) Benth. | Native |
| *Copaifera officinalis* L. | Native |
| *Crotalaria retusa* L. | Exotic |
| *Dahlstedtia muehlbergiana* (Hassl.) M.J.Silva & A.M.G.Azevedo | Native |
| *Desmodium adscendens* (Sw.) DC. | Native |
| *Desmodium barbatum* (L.) Benth. | Native |
| *Dialium guianense* (Aubl.) Sandwith | Native |
| *Erythrina corallodendron* L. | Exotic |
| *Erythrina mulungu* Mart. | Native |
| *Erythrina plumeri* Urb. | Exotic |
| *Erythrina senegalensis* DC. | Exotic |
| *Erythrina speciosa* Andrews | Native |
| *Erythrina verna* Vell. | Native |
| *Glycine max* (L.) Merr. | Exotic |
| *Hymenaea courbaril* L. | Native |
| *Hymenaea stigonocarpa* Mart. ex Hayne | Native |
| *Inga edulis* Mart. | Native |
| *Lens culinaris* Medik. | Exotic |
| *Libidibia ferrea* (Mart. ex Tul.) L.P.Queiroz | Native |
| *Libidibia ferrea* var. leiostachya (Benth.) L.P.Queiroz | Native |
| *Libidibia paraguariensis* (D.Parodi) G.P.Lewis | Native |
| *Macropsychanthus violaceus* (Mart. ex Benth.) L.P.Queiroz & Snak | Native |
| *Mimosa pigra* var. asperata (L.) Zarucchi, Vincent & Gandhi | Exotic |
| *Mimosa pudica* L. | Native |
| *Mimosa schomburgkii* Benth. | Native |
| *Mimosa tenuiflora* (Willd.) Poir. | Native |
| *Mucuna pruriens* (L.) DC. | Native |
| *Ormosia arborea* (Vell.) Harms | Native |
| *Parapiptadenia rigida* (Benth.) Brenan | Native |
| *Paubrasilia echinata* (Lam.) Gagnon, H.C.Lima & G.P.Lewis | Native |
| *Phaseolus vulgaris* L. | Exotic |
| *Pterocarpus officinalis* Jacq. | Native |
| *Pterodon emarginatus* Vogel | Native |
| *Schizolobium parahyba* (Vell.) Blake | Native |
| *Senna alata* (L.) Roxb. | Native |
| *Senna occidentalis* (L.) Link | Native |
| *Senna spectabilis* var. excelsa (Schrad.) H.S.Irwin & Barneby | Native |
| *Senna splendida* (Vogel) H.S.Irwin & Barneby | Native |
| *Senna uniflora* (Mill.) H.S.Irwin & Barneby | Native |
| *Stryphnodendron adstringens* (Mart.) Coville | Native |
| *Tamarindus indica* L. | Exotic |
| *Tetrapleura tetraptera* (Schumach. & Thonn.) Taub. | Exotic |
| *Vigna unguiculata* (L.) Walp. | Exotic |
| *Zornia diphylla* (L.) Pers. | Exotic |
| *Zornia latifolia* Sm. | Native |
| Geraniaceae | |
| *Pelargonium graveolens* L´Hér. | Exotic |
| *Pelargonium hortorum* L.H.Bailey | Exotic |
| *Pelargonium zonale* (L.) L´Hér. | Exotic |
| Heliotropiaceae | |
| *Heliotropium indicum* L. | Native |
| *Myriopus paniculatus* (Cham.) Feuillet | Native |
| Hernandiaceae | |
| *Sparattanthelium tupiniquinorum* Mart. | Native |
| Hypericaceae | |
| *Vismia guianensis* (Aubl.) Choisy | Native |
| Iridaceae | |
| *Eleutherine bulbosa* (Mill.) Urb. | Native |
| *Gladiolus grandiflorus* Andrews | Exotic |
| Gladiolus × hortulanus L.H.Bailey | Exotic |
| Irvingiaceae | |
| *Irvingia gabonensis* (Aubry-Lecomte ex O'Rorke) Baill. | Exotic |
| Lamiaceae | |
| *Aeollanthus suaveolens* Mart. ex Spreng. | Exotic |
| *Coleus comosus* Hochst. ex Gürke | Exotic |
| *Coleus ornatus* (Codd) A.J.Paton | Exotic |
| *Cunila microcephala* Benth. | Native |
| *Lavandula angustifolia* Mill. | Exotic |
| *Lavandula dentata* L. | Exotic |
| *Leonotis nepetifolia* (L.) R.Br. | Exotic |
| *Melissa officinalis* L. | Exotic |
| *Mentha arvensis* L. | Exotic |
| *Mentha piperita* L. | Exotic |
| *Mentha pulegium* L. | Exotic |
| *Mentha spicata* L. | Exotic |
| *Mentha x* rotundifolia (L.) Huds. | Exotic |
| *Mentha x* villosa Huds. | Exotic |
| *Mesosphaerum pectinatum* (L.) Kuntze | Native |
| *Mesosphaerum suaveolens* (L.) Kuntze | Native |
| *Ocimum americanum* L. | Exotic |
| *Ocimum basilicum* L. | Exotic |
| *Ocimum campechianum* Mill. | Native |
| *Ocimum carnosum* (Spreng.) Link & *Otto ex* Benth. | Native |
| *Ocimum gratissimum* L. | Exotic |
| *Ocimum minimum* L. | Exotic |
| *Ocimum tenuiflorum* L. | Exotic |
| *Origanum majorana* L. | Exotic |
| *Origanum vulgare* L. | Exotic |
| *Ouret lanata* (L.) Kuntze | Exotic |
| *Plectranthus amboinicus* (Lour.) Spreng. | Exotic |
| *Plectranthus barbatus* Andr. | Exotic |
| *Plectranthus neochilus* Schltr. | Exotic |
| *Plectranthus verticillatus* (L.f.) Druce | Exotic |
| *Pogostemon cablin* (Blanco) Benth. | Exotic |
| *Pogostemon heyneanus* Benth. | Exotic |
| *Rosmarinus officinalis* L. | Exotic |
| *Salvia officinalis* L. | Exotic |
| *Salvia rosmarinus* Spenn. | Exotic |
| *Salvia splendens* *Sellow ex* Nees | Native |
| *Tetradenia riparia* (Hochst.) Codd | Exotic |
| *Thymus vulgaris* L. | Exotic |
| *Vitex agnus-castus* L. | Exotic |
| *Vitex doniana* Sweet | Exotic |
| *Vitex megapotamica* (Spreng.) Moldenke | Native |
| Lauraceae | |
| *Cinnamomum verum* J.Presl | Exotic |
| *Laurus nobilis* L. | Exotic |
| *Neolitsea cassia* (L.) Kosterm. | Exotic |
| *Persea americana* Mill. | Exotic |
| Lecythidaceae | |
| *Bertholletia excelsa* Bonpl. | Native |
| Liliaceae | |
| *Lilium candidum* L. | Exotic |
| Linderniaceae | |
| *Torenia thouarsii* (Cham. & Schltdl.) Kuntze | Native |
| Loganiaceae | |
| *Spigelia anthelmia* L. | Native |
| Loranthaceae | |
| *Struthanthus flexicaulis* (Mart.) Mart. | Native |
| Lycopodiaceae | |
| *Huperzia subulata* (Desv.) Holub | Exotic |
| Lygodiaceae | |
| *Lygodium venustum* Sw. | Native |
| *Lygodium volubile* Sw. | Native |
| Lythraceae | |
| *Cuphea carthagenensis* (Jacq.) J.F.Macbr. | Native |
| *Cuphea racemosa* (L.f.) Spreng. | Native |
| *Lawsonia inermis* L. | Exotic |
| *Punica granatum* L. | Exotic |
| Malpighiaceae | |
| *Byrsonima intermedia* A.Juss. | Native |
| *Byrsonima sericea* DC. | Native |
| *Byrsonima verbascifolia* (L.) DC. | Native |
| *Malpighia emarginata* DC. | Exotic |
| Malvaceae | |
| *Abelmoschus esculentus* (L.) Moench | Exotic |
| *Abutilon megapotamicum* (Spreng.) A.St.-Hil. & Naudin | Native |
| *Cola acuminata* (P.Beauv.) Schott & Endl. | Exotic |
| *Glyphaea brevis* (Biehler) Monach. | Exotic |
| *Gossypium barbadense* L. | Exotic |
| *Gossypium hirsutum* L. | Native |
| *Guazuma ulmifolia* Lam. | Native |
| *Luehea divaricata* Mart. | Native |
| *Malva moschata* L. | Exotic |
| *Malva sylvestris* L. | Exotic |
| *Malvastrum coromandelianum* (L.) Garcke | Native |
| *Pachira insignis* (Sw.) Sw. ex Savigny | Native |
| *Pavonia cancellata* (L.) Cav. | Native |
| *Sida cordifolia* L. | Native |
| *Sida linifolia* Cav. | Native |
| *Sida rhombifolia* L. | Native |
| *Triplochiton scleroxylon* K.Schum. | Exotic |
| *Triumfetta bartramia* L. | Native |
| *Waltheria indica* L. | Native |
| Marantaceae | |
| *Stromanthe jacquinii* (Roem. & Schult.) H.Kenn. & Nicolson | Exotic |
| Melastomataceae | |
| *Clidemia hirta* (L.) D.Don | Native |
| *Miconia albicans* (Sw.) Steud. | Native |
| *Miconia calvescens* DC. | Native |
| *Miconia minutiflora* (Bonpl.) DC. | Native |
| *Miconia serialis* DC. | Native |
| *Pleroma granulosum* (Desr.) D. Don | Native |
| Meliaceae | |
| *Cedrela fissilis* Vell. | Native |
| *Cedrela odorata* L. | Native |
| *Guarea guidonia* (L.) Sleumer | Native |
| *Melia azedarach* L. | Exotic |
| Menispermaceae | |
| *Cissampelos ovalifolia* DC. | Native |
| Molluginaceae | |
| *Glinus oppositifolius* (L.) Aug.DC. | Exotic |
| Monimiaceae | |
| *Peumus boldus* Molina | Exotic |
| Moraceae | |
| *Artocarpus heterophyllus* Lam. | Exotic |
| *Ficus asperifolia* Miq. | Exotic |
| *Ficus gomelleira* Kunth | Native |
| *Ficus sur* Forssk. | Exotic |
| *Milicia excelsa* (Welw.) C.C. Berg | Exotic |
| *Morus alba* L. | Exotic |
| *Morus nigra* L. | Exotic |
| *Sorocea guilleminiana* Gaudich. | Native |
| Moringaceae | |
| *Moringa oleifera* Lam. | Exotic |
| Musaceae | |
| *Musa acuminata* Colla | Exotic |
| *Musa paradisiaca* L. | Exotic |
| Myristicaceae | |
| *Myristica fragrans* Houtt. | Exotic |
| *Virola surinamensis* (Rol. ex Rottb.) Warb. | Native |
| Myrtaceae | |
| *Callistemon linearis* (Schrad. & J.C.Wendl.) Colv. ex Sweet | Exotic |
| *Campomanesia xanthocarpa* (Mart.) O.Berg | Native |
| *Eucalyptus globulus* Labill. | Exotic |
| *Eugenia myrcianthes* Nied. | Native |
| *Eugenia uniflora* L. | Native |
| *Pimenta pseudocaryophyllus* (Gomes) Landrum | Native |
| *Plinia peruviana* (Poir.) Govaerts | Native |
| *Psidium cattleyanum* Sabine | Native |
| *Psidium guajava* L. | Native |
| *Psidium guineense* Sw. | Native |
| *Syzygium aromaticum* (L.) Merr. & L.M.Perry | Exotic |
| *Syzygium cumini* (L.) Skeels | Exotic |
| *Syzygium jambos* (L.) Alston | Exotic |
| Nyctaginaceae | |
| *Boerhavia diffusa* L. | Native |
| *Boerhavia repens* L. | Exotic |
| *Mirabilis jalapa* L. | Exotic |
| Nymphaeaceae | |
| *Nymphaea lotus* L. | Exotic |
| *Victoria amazonica* (Poepp.) J.E.Sowerby | Native |
| Oleaceae | |
| *Olea europaea* L. | Exotic |
| Orchidaceae | |
| *Cyrtopodium punctatum* (L.) Lindl. | Exotic |
| *Vanilla palmarum* Lindl. | Native |
| Oxalidaceae | |
| *Averrhoa bilimbi* L. | Exotic |
| *Averrhoa carambola* L. | Exotic |
| Papaveraceae | |
| *Argemone mexicana* L. | Exotic |
| Passifloraceae | |
| *Passiflora edulis* Sims | Native |
| Pedaliaceae | |
| *Sesamum radiatum* Thonn. ex Hornem. | Exotic |
| Phyllanthaceae | |
| *Flueggea virosa* (Roxb. ex Willd.) Royle | Exotic |
| *Phyllanthus amarus* Schumach. & Thonn. | Native |
| *Phyllanthus niruri* L. | Native |
| Phytolaccaceae | |
| *Gallesia integrifolia* (Spreng.) Harms | Native |
| *Petiveria alliacea* L. | Native |
| Piperaceae | |
| *Peperomia pellucida* (L.) Kunth | Native |
| *Piper aduncum* L. | Native |
| *Piper anisum* (Spreng.) Angely | Native |
| *Piper arboreum* Aubl. | Native |
| *Piper eucalyptophyllum* C.DC. | Native |
| *Piper gaudichaudianum* Kunth | Native |
| *Piper guineense* Schumach. & Thonn. | Exotic |
| *Piper ilheusense* Yunck. | Native |
| *Piper marginatum* Jacq. | Native |
| *Piper mollicomum* Kunth | Native |
| *Piper nigrum* L. | Exotic |
| *Piper peltatum* L. | Native |
| *Piper scolopendrifolium* Raddi | Native |
| *Piper umbellatum* L. | Native |
| Plantaginaceae | |
| *Atropa bella-donna* L. | Exotic |
| *Bacopa scoparioides* (Cham. & Schltdl.) Scatigna | Native |
| *Plantago major* L. | Exotic |
| *Scoparia dulcis* L. | Native |
| *Stemodia viscosa* Roxb. | Exotic |
| Plumbaginaceae | |
| *Plumbago scandens* L. | Native |
| Poaceae | |
| *Arundo donax* L. | Exotic |
| *Bambusa vulgaris* Schrad. ex J.C.Wendl. | Exotic |
| *Chrysopogon zizanioides* (L.) Roberty | Exotic |
| *Coix lacryma-jobi* L. | Exotic |
| *Cymbopogon citratus* (DC.) Stapf | Exotic |
| *Cymbopogon flexuosus* (Nees) Will.Watson | Exotic |
| *Cymbopogon winterianus* *Jowitt ex* Bor | Exotic |
| *Cynodon dactylon* (L.) Pers. | Exotic |
| *Dactyloctenium aegyptium* (L.) Willd. | Exotic |
| *Digitaria velutina* (Forssk.) P.Beauv. | Exotic |
| *Eleusine indica* (L.) Gaertn. | Exotic |
| *Hordeum vulgare* L. | Exotic |
| *Megathyrsus maximus* (Jacq.) B.K.Simon & S.W.L.Jacobs | Exotic |
| *Oryza sativa* L. | Exotic |
| *Paspalum fimbriatum* Kunth | Native |
| *Paspalum notatum* Flüggé | Native |
| *Phalaris canariensis* L. | Exotic |
| *Polypogon elongatus* Kunth | Native |
| *Pseudosasa humilis* (Mitford) T.Q.Nguyen | Exotic |
| *Saccharum officinarum* L. | Exotic |
| *Zea mays* L. | Exotic |
| Polygalaceae | |
| *Senega sericea* (A.W.Benn.) J.F.B.Pastore | Native |
| Polygonaceae | |
| *Polygonum hydropiperoides* Michx. | Native |
| *Polygonum punctatum* Elliott | Native |
| Polypodiaceae | |
| *Microgramma vacciniifolia* (Langsd. & Fisch.) Copel. | Native |
| *Phlebodium aureum* (L.) J.Sm. | Native |
| *Phlebodium decumanum* (Willd.) J.Sm. | Native |
| Pontederiaceae | |
| *Eichhornia crassipes* (Mart.) Solms | Native |
| Portulacaceae | |
| *Portulaca oleracea* L. | Exotic |
| Pteridaceae | |
| *Adiantum capillus-veneris* L. | Native |
| Rhamnaceae | |
| *Sarcomphalus joazeiro* (Mart.) Hauenschild | Native |
| Rosaceae | |
| *Fragaria vesca* L. | Exotic |
| Fragaria ×ananassa *Duchesne ex* Rozier | Exotic |
| *Malus pumila* Mill. | Exotic |
| *Prunus domestica* L. | Exotic |
| *Prunus persica* (L.) Batsch | Exotic |
| *Rosa alba* L. | Exotic |
| *Rosa centifolia* L. | Exotic |
| *Rosa centifolia* L. | Exotic |
| *Rosa gallica* L. | Exotic |
| *Rosa rubiginosa* L. | Exotic |
| Rosa × grandiflora Charb. | Exotic |
| *Rubus idaeus* L. | Exotic |
| Rubiaceae | |
| *Borreria verticillata* (L.) G.Mey. | Native |
| *Chassalia kolly* (Schumach.) Hepper | Exotic |
| *Coffea arabica* L. | Exotic |
| *Coutarea hexandra* (Jacq.) K.Schum. | Native |
| *Genipa americana* L. | Native |
| *Mitracarpus frigidus* (Willd. ex Roem. & Schult.) K.Schum. | Native |
| *Mitracarpus hirtus* (L.) DC. | Native |
| *Sabicea calycina* Benth. | Exotic |
| *Sabicea grisea* Cham. & Schltdl. | Native |
| Rutaceae | |
| *Citrus aurantiifolia* (Christm.) Swingle | Exotic |
| *Citrus aurantium* L. | Exotic |
| *Citrus limon* (L.) Osbeck | Exotic |
| *Citrus reticulata* Blanco | Exotic |
| *Citrus sinensis* (L.) Osbeck | Exotic |
| *Hortia brasiliana* Vand. ex DC. | Native |
| *Murraya paniculata* (L.) Jack | Exotic |
| *Pilocarpus microphyllus* *Stapf ex* Wardlew. | Native |
| *Pilocarpus pennatifolius* Lem. | Native |
| *Ruta graveolens* L. | Exotic |
| *Zanthoxylum zanthoxyloides* (Lam.) Zepern. & Timler | Exotic |
| Salicaceae | |
| *Casearia sylvestris* Sw. | Native |
| *Salix babylonica* L. | Exotic |
| Salviniaceae | |
| *Salvinia auriculata* Aubl. | Native |
| *Salvinia auriculata* Aubl. var. auriculata | Native |
| Santalaceae | |
| *Jodina rhombifolia* (Hook. & Arn.) Reissek | Native |
| Sapindaceae | |
| *Blighia sapida* K.D.Koenig | Exotic |
| *Cupania vernalis* Cambess. | Native |
| *Lecaniodiscus cupanioides* Planch. ex Benth. | Exotic |
| *Talisia esculenta* (Cambess.) Radlk. | Native |
| Sapotaceae | |
| *Sideroxylon obtusifolium* (Roem. & Schult.) T.D.Penn. | Native |
| *Synsepalum dulcificum* (Schumach. & Thonn.) Daniell | Exotic |
| *Vitellaria paradoxa* C.F.Gaertn. | Exotic |
| Schisandraceae | |
| *Illicium verum* Hook.f. | Exotic |
| Selaginellaceae | |
| *Selaginella convoluta* (Arn.) Spring | Native |
| Siparunaceae | |
| *Siparuna brasiliensis* (Spreng.) A.DC. | Native |
| *Siparuna guianensis* Aubl. | Native |
| Smilacaceae | |
| *Smilax campestris* Griseb. | Native |
| *Smilax japicanga* Griseb. | Native |
| Solanaceae | |
| *Aspilia africana* subsp. africana | Exotic |
| *Brugmansia suaveolens* (Willd.) Sweet | Native |
| *Brunfelsia brasiliensis* (Spreng.) L.B.Sm. & Downs | Native |
| *Brunfelsia uniflora* (Pohl) D.Don | Native |
| *Capsicum annuum* L. | Native |
| *Capsicum baccatum* L. | Native |
| *Capsicum baccatum* var. pendulum (Willd.) Eshbaugh | Native |
| *Capsicum frutescens* L. | Native |
| *Cestrum axillare* Vell. | Native |
| *Datura metel* L. | Exotic |
| *Nicotiana tabacum* L. | Exotic |
| *Solanum aculeatissimum* Jacq. | Native |
| *Solanum americanum* Mill. | Native |
| *Solanum argenteum* Dunal | Native |
| *Solanum cernuum* Vell. | Native |
| *Solanum lycopersicum* L. | Exotic |
| *Solanum mauritianum* Scop. | Native |
| *Solanum paniculatum* L. | Native |
| *Solanum pimpinellifolium* L. | Exotic |
| *Solanum pseudoquina* A.St.-Hil. | Native |
| *Solanum stipulaceum* Willd. ex Roem. & Schult. | Native |
| *Solanum tuberosum* L. | Exotic |
| *Solanum vellozianum* Dunal | Native |
| Strelitziaceae | |
| *Strelitzia reginae* Banks | Exotic |
| Styracaceae | |
| *Styrax benzoin* Dryand. | Exotic |
| Talinaceae | |
| *Talinum paniculatum* (Jacq.) Gaertn. | Native |
| Thelypteridaceae | |
| *Christella dentata* (Forssk.) Brownsey & Jermy | Exotic |
| Urticaceae | |
| *Cecropia glaziovii* Snethl. | Native |
| *Cecropia palmata* Willd. | Native |
| *Laportea aestuans* (L.) Chew | Native |
| *Pilea microphylla* (L.) Liebm. | Exotic |
| *Urera baccifera* (L.) Gaudich. ex Wedd. | Native |
| *Urtica dioica* L. | Exotic |
| *Urtica urens* L. | Exotic |
| Verbenaceae | |
| *Aloysia citrodora* Palau | Exotic |
| *Aloysia gratissima* (Gillies & Hook.) Tronc. | Native |
| *Citharexylum myrianthum* Cham. | Native |
| *Lantana camara* L. | Native |
| *Lippia alba* (Mill.) N.E.Br. ex Britton & P.Wilson | Native |
| *Lippia origanoides* Kunth | Native |
| *Priva lappulacea* (L.) Pers. | Native |
| *Stachytarpheta cayennensis* (Rich.) Vahl | Native |
| *Stachytarpheta jamaicensis* (L.) Vahl | Exotic |
| Violaceae | |
| *Pombalia calceolaria* (L.) Paula-Souza | Native |
| *Viola tricolor* L. | Exotic |
| Vitaceae | |
| *Cissus verticillata* (L.) Nicolson & C.E.Jarvis | Native |
| *Vitis vinifera* L. | Exotic |
| Zingiberaceae | |
| *Aframomum melegueta* K.Schum. | Exotic |
| *Alpinia purpurata* (Vieill.) K.Schum. | Exotic |
| *Alpinia zerumbet* (Pers.) B.L.Burtt & R.M.Sm. | Exotic |
| *Curcuma longa* L. | Exotic |
| *Hedychium coronarium* J.Koenig | Exotic |
| *Renealmia brasiliensis* K.Schum. | Native |
| *Zingiber officinale* Roscoe | Exotic |
